# Supplementary material for: Novel mixed nickel/cobalt hexacyanoferrate microcubes with synergistic effects for aqueous hybrid supercapacitors
Source: Royal Society of Chemistry journal article supplement (doi:10.1039/d4dt02124j), 2024-01-01
Supplement: d4dt02124j1.pdf [file d4dt02124j1.pdf]

## Novel mixed nickel/cobalt hexacyanoferrate microcubes with synergistic effect for aqueous hybrid supercapacitors

(supporting information)

Vu Van Thuy<sup>1,2</sup>, Nguyen Si Hieu<sup>3</sup>, and Tran Viet Thu<sup>1</sup>✉

<sup>1</sup>*Department of Physics and Chemical Engineering, Le Quy Don Technical University, 236 Hoang Quoc Viet, Hanoi 100000, Vietnam*

<sup>2</sup>*Graduate University of Science and Technology, Vietnam Academy of Science and Technology, 18 Hoang Quoc Viet, Cau Giay, Hanoi 100000, Vietnam*

<sup>3</sup>*Institute of Materials Science, Vietnam Academy of Science and Technology, 18 Hoang Quoc Viet, Cau Giay, Hanoi 100000, Vietnam*

✉Corresponding authors: E-mail: [thutv@mta.edu.vn](mailto:thutv@mta.edu.vn); Tel: +84 964 793 732

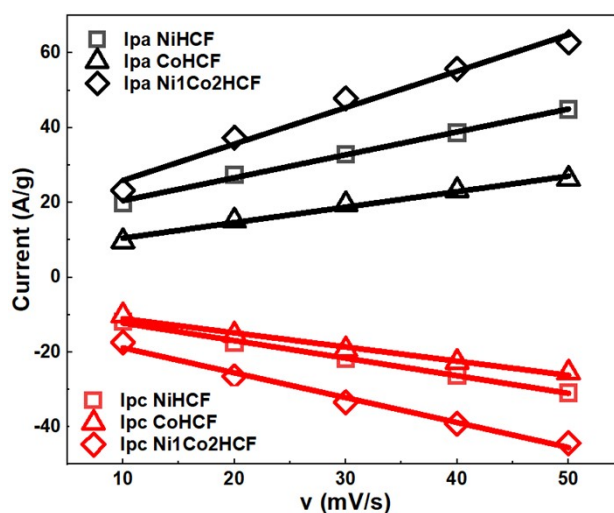

**Figure S1.** Scan rate-dependent  $I_{pa}$  and  $I_{pc}$  of NiHCF, CoHCF, and Ni<sub>1</sub>Co<sub>2</sub>HCF

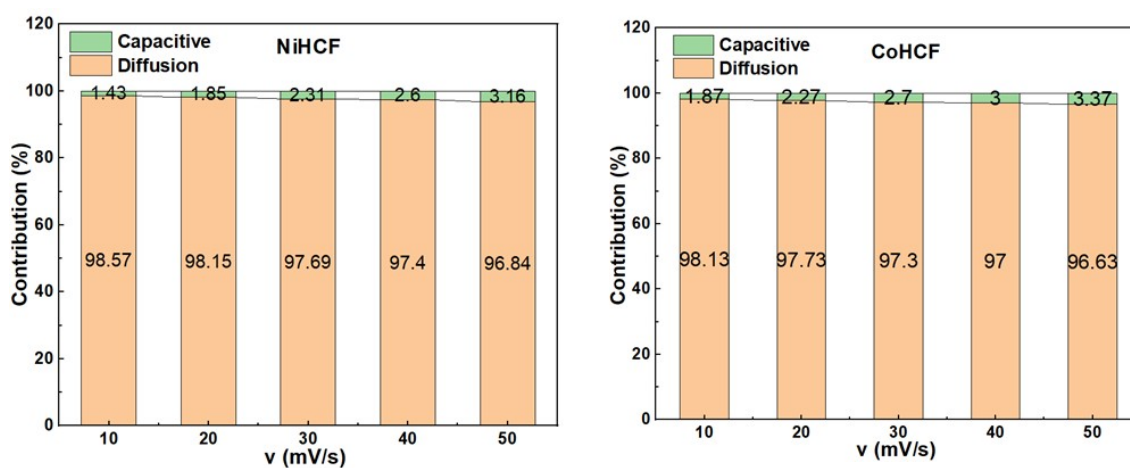

**Figure S2.** Capacity contribution of NiHCF (left) and CoHCF (right).

**Table S1.** Energy characteristics of the supercapacitor prototype

| Current density (mA cm <sup>-2</sup> ) | Specific (areal) capacitance (mF cm <sup>-2</sup> ) | Energy density (μWh cm <sup>-2</sup> ) | Power density (μW cm <sup>-2</sup> ) |
|----------------------------------------|-----------------------------------------------------|----------------------------------------|--------------------------------------|
| 1.0                                    | 238.0                                               | 74.4                                   | 750                                  |
| 2.0                                    | 108.5                                               | 33.9                                   | 1500                                 |
| 3.0                                    | 55.5                                                | 17.3                                   | 2244                                 |
| 4.0                                    | 26.8                                                | 8.4                                    | 3009                                 |
| 5.0                                    | 14.5                                                | 4.5                                    | 3724                                 |
